# 1 **Beyond the ribosome: proteome-wide secretability studies** 2 **with SECRiFY**

3 Boone, M.<sup>1,2,7</sup>; Ramasamy, P.<sup>1,3,4,5,6</sup>, Maddelein, D.<sup>1,3</sup>, Turan, D.<sup>1,3</sup>, Vandermarliere, E.<sup>1,3</sup>,  
4 Vranken, W.<sup>4,5,6</sup>, Callewaert, N.<sup>1,2</sup>

5 1. Center for Medical Biotechnology, VIB, Zwijnaarde, Belgium

6 2. L-ProBE, Department of Biochemistry and Microbiology, Faculty of Sciences, UGent, Ghent, Belgium

7 3. Department of Biochemistry, Faculty of Medicine and Health Sciences, UGent, Ghent, Belgium

8 4. Structural Biology Brussels, VUB, Brussels, Belgium

9 5. Structural Biology Research Center, VIB, Brussels, Belgium

10 6. Interuniversity Institute of Bioinformatics in Brussels (IB)<sup>2</sup>, ULB-VUB, Brussels, Belgium

11 7. Present address: Department of Biochemistry and Biophysics, UCSF, San Francisco, CA, USA  
12

13

## 14 **Abstract**

15 While transcriptome- and proteome-wide technologies to assess processes in protein  
16 biogenesis up to the ribosome-associated stages are now widely available, we still lack global  
17 approaches to assay post-ribosomal processes, in particular those occurring in the eukaryotic  
18 secretory system. We developed SECRiFY to simultaneously assess the secretability of  $>10^5$   
19 heterologous protein fragments by two yeast species, *S. cerevisiae* and *P. pastoris*, using  
20 custom fragment libraries, surface display and a sequencing-based readout. SECRiFY  
21 generates datasets that enable datamining into protein features underlying secretability, and it  
22 will enable studies of the impact of secretory system perturbation on the secretable proteome.  
23

23

## 24 **Main text**

25 The eukaryotic secretory system processes roughly a quarter of the proteome, ensuring  
26 correct folding, assembly, and delivery of proteins to the extracellular environment, the plasma  
27 membrane, or membrane-bound organelles<sup>1-3</sup>. Many proteins and processes involved in these  
28 pathways have been identified through studies using just a few model secretory cargos, but  
29 an integrative understanding of their role in enabling production of the thousands of secretory  
30 proteins is still lacking. For example, it is generally unknown which chaperones are critical for  
31 assisting the folding of which types of secretory protein domains. Unfortunately, most current  
32 approaches are unsuited to study a comprehensive range of protein folds after entry in the ER.  
33 In practice, the absence of such an integrated picture of the secretory system is most apparent  
34 in the unpredictability of heterologous protein secretion. Indeed, four decades after the

35 recombinant DNA revolution, obtaining detectable levels of functional protein in a particular  
36 heterologous host system (secretory or not) is still principally a process of trial and error. This  
37 slows down progress in the many fields of basic and applied life science where recombinant  
38 protein production comes into play. Although expression screening of parallel constructs or  
39 variant libraries of a protein of interest has gained momentum<sup>4-6</sup> to increase heterologous  
40 protein expression success rates, it has to be repeated for each new target. Additionally,  
41 alternative comprehensive strategies to assess heterologous expression across entire  
42 proteomes have generally been limited to intracellular expression in *E. coli*, small proteomes,  
43 or clone-by-clone strategies<sup>7-10</sup>.

44 To assay the secretory potential of (human) protein fragments in yeast on a proteome-wide  
45 scale, we combined yeast surface display of a novel type of protein fragment libraries and deep  
46 sequencing, and dubbed the platform SECRiFY (SECretability screening of Recombinant  
47 Fragments in Yeast) (**Fig. 1a and e**). By focusing on domain-sized protein fragments rather  
48 than full-length proteins, we avoid missing detection of secretability of parts of multi-domain  
49 proteins that fail to express or secrete in their entirety due to local issues with misfolding of  
50 particular protein areas, translation inhibitory sequences, protease susceptibility, the absence  
51 of stabilizing interaction partners or modifications, or toxicity. Chopping up difficult proteins in  
52 experimentally tractable fragments has been exploited by structural biologists for years, both  
53 in rational target design as well as in random library screens for soluble expression<sup>11-15</sup>.  
54 Considering the notorious inaccuracies of domain boundary prediction<sup>16</sup>, and the knowledge  
55 that, even with a reliable estimate, small variations in the exact N- and C-terminus of the  
56 fragment can lead to dramatic differences in expressability<sup>16</sup>, we opted for a random  
57 fragmentation approach. We designed and built directional, randomly fragmented cDNA  
58 libraries covering the human transcriptome with fragments coding for approx. 50-100 amino  
59 acids, which is the median domain size of human proteins (**Fig. 1b, Suppl. Fig 1a**). To reduce  
60 fragment abundance differences inherent to the large dynamic range of mRNA transcripts in  
61 human cells, we normalized this library using the Kamchatka crab duplex-specific nuclease<sup>17,18</sup>  
62 (**Suppl. Fig. 1b**). Careful optimization of the random primer tag sequence for compatibility with  
63 normalization effectively minimized the required library size by approx. 1000-fold, to within a  
64 range that is feasibly reconcilable with the diversity that can be routinely obtained in cDNA  
65 library construction and yeast transformation ( $\pm 5 \cdot 10^6 - 5 \cdot 10^7$ ) (**Fig. 1c-d, Suppl. Results**).  
66 To our knowledge, this is the first time that an effective method for normalization of tagged  
67 random-primed cDNA fragment libraries is reported, and required substantial development  
68 (see also **Suppl. Fig. 1c**). This new method should also find many applications in areas where  
69 the protein-coding potential of a cell needs to be effectively covered in expression libraries.

70 Relying on the sophisticated quality control (QC) machinery of the eukaryotic secretory system,  
71 which ensures efficient degradation of unstable or misfolded proteins<sup>19,20</sup>, we further reasoned  
72 that surface display could be used as a proxy for productive secretion. As such, once cloned  
73 into the surface display vector and transferred to yeast, library polypeptides are directed to the  
74 secretory system by an N-terminal secretory leader sequence (MF $\alpha$ 1 prepro), and furthermore  
75 on the yeast cell wall via C-terminal fusion to the GPI-anchoring region of the *S. cerevisiae* cell  
76 wall protein Sag1 (**Fig. 1a**). Fragments for which the fragment-Sag1 fusion successfully passes  
77 (or escapes) secretory system QC without proteolytic degradation are recognized through their  
78 N- and C-terminal epitope tags (FLAG and V5, resp.), and are segregated from the rest using  
79 iterations of high-efficiency magnetic- and fluorescence-activated cell sorting (MACS/FACS)  
80 (**Fig. 1e**). Finally, fragment identification and classification is achieved by deep sequencing of  
81 recovered fragment amplicons from the unsorted and sorted cell populations (**Fig. 1e and**  
82 **Suppl. Fig 2**).

83 We first benchmarked the method in *S. cerevisiae*. Triplicate secretion screening of a  $1.96 \times 10^6$   
84 clone fragment library of the HEK293T transcriptome in this yeast revealed that on average  
85  $1.76\% \pm 0.12\%$  of library cells displayed a fragment with an intact N-terminus (FLAG-tag) and  
86 intact C-terminus (V5-tag) (**Fig. 1e, Suppl. Fig 3**). Accounting for a 1/9 chance of up- and  
87 downstream in-frame cloning, this means that approximately 15.8% of in-frame fragments are  
88 detectably displayed and hence, potentially secretable. After a 32-fold enrichment of these  
89 double positive cells through a single round of MACS and two subsequent rounds of FACS  
90 (**Fig. 1e, Suppl. Fig. 3**), followed by sequencing of the final sorted population, on average,  
91  $1.12 \times 10^6$  unique fragments/replicate were detected, covering on average  $26.45\% \pm 0.86\%$  of  
92 the human canonical transcriptome with at least three reads (**Supp. Table 1-3**). To assess the  
93 secretion-predictive value of the method, we picked random clones from the sorted population  
94 of a single experiment (**Suppl. Fig. 4, Suppl. Table 4**) and tested the secretion of their  
95 encoded fragments when not fused to the anchor protein Sag1. The N- or C-terminal tags of  
96 18/20 (90%) fragments could be reliably detected on western blot from the growth medium,  
97 and for 16/20 (80%) fragments, both tags were recognized (**Fig. 1f, Supp. Table 5**). As such,  
98 fragments displayed by sorted cells are indeed 'secretable' with a high probability. We further  
99 classified fragments into those that were enriched (also referred to as secretable) and those  
100 that were passively depleted (hence, not detected as secretable) by sorting, setting an arbitrary  
101 cut-off on the enrichment factor ( $E \text{ factor} = \log_2 \frac{FPTM_{sorted}}{FPTM_{unsorted}}$ ) at 1 and -1, respectively,  
102 reflecting a minimal 2-fold increase and decrease in normalized sequence read counts after  
103 sorting. Indeed, as our MACS/FACS based sorting scheme was operated as a binary classifier  
104 (sorted/non-sorted), a binary threshold-based classifier is more appropriate in data processing  
105 than generalized linear models. Of 170,226 in-frame fragments commonly detected in the three

106 experiments, 6.83% were consistently enriched in all three replicates, and 80.21% consistently  
107 depleted (**Supp. Table 6, Suppl. Fig. 5**). Thus, using this metric, these screens were  
108 reproducible with an 87.03% concordance between replicates. Even this partial-coverage  
109 dataset now represents by far the largest resource on eukaryotic secretability of human protein  
110 fragments. To enable researchers to easily access and analyze the data from the screens in  
111 this study, we built an interactive database (<http://iomics.ugent.be/secrify/search>) allowing  
112 visualization of the protein fragments detected in these screens and their mapping on available  
113 PDB structures (**Suppl. Fig. 11**, Figshare links to data in **Online Methods**).

114 Just as cytosolic protein expression is influenced by a variety of DNA, mRNA, and protein  
115 sequence or structural features and their complex interplays<sup>21-24</sup>, fragment secretion will  
116 depend on a combination of multiple parameters, some of which are related to the unique  
117 environment and QC machinery of the ER and beyond. Even already at the simple level of  
118 general averaged parameters over the entire secretable vs. non-secretable protein fragment  
119 collections, several intriguing observations emerged from our data. Based on predictions of  
120 biophysical propensities and on PDB structure mapping (see also **Suppl. Fig. 12**), secretable  
121 fragments not only tend to have a lower  $\alpha$ -helical content than depleted fragments (**Fig. 2a-b**,  
122 **Suppl. Fig. 13-14**), but are also distinctly more flexible and intrinsically disordered (**Fig. 2c-d**,  
123 **Suppl. Fig. 15a-16**), as well as slightly compositionally biased (**Suppl. Fig. 17-18**, see also  
124 **Suppl. Results**). Possibly, this reflects how unstructured sequences that lack typical exposed  
125 hydrophobic amino acids are missed by ER chaperones and can subsequently travel  
126 downstream. In contrast, no clear differences in number of Cys or N-glycosylation sequons  
127 were observed (**Suppl. Fig. 17f-g, Suppl. Fig. 18f-g**). Increasing the fidelity of these findings,  
128 all of these patterns were reproduced in screens of a different library of slightly larger fragments  
129 in a different yeast species (*P. pastoris*) (**Suppl. Results, Suppl. Table 7-10, Suppl. Figs. 6-**  
130 **19**). As for the early folding probability (**Suppl. Fig. 14b**), in cases where depleted and enriched  
131 fragments overlap in sequence on the same protein, the presence or absence of regions that  
132 are most likely to fold rapidly often correlates with secretability (**Fig. 2e**). Of those fragments  
133 that mapped to known structures (roughly 50% of representative fragments), secretable  
134 fragments are enriched in distorted sandwich and  $\beta$  complex folds compared to depleted  
135 fragments, suggesting that these folds are potentially more stable in the secretory  
136 environment, while the opposite is true for proteins with, for example, an  $\alpha$  horseshoe  
137 architecture (**Suppl. Table 11**, Figshare links to data in **Online Methods**). Similarly, certain  
138 Pfam domains, such as the AAA18-domain (PF13238), are more prominent in enriched  
139 fragments than depleted fragments, while many typically cytoplasmic domains such as  
140 ribosomal protein domains or the tetratricopeptide repeat (TPR, PF13181) are found  
141 exclusively in depleted fragments (Figshare links to data in **Online Methods**, see also **Suppl.**

142 **Fig. 19).** This illustrates that sequence- and fold-contextual patterns of features still contain  
143 much information that is not apparent from averaged parameters. For the first time, our  
144 SECRiFY method generates secretability data at a scale at which training of predictive  
145 machine learning classifiers becomes feasible and this will be a subject of future work.

146 With SECRiFY, we thus demonstrate that the secretability of protein fragments across entire  
147 proteomes can be verified experimentally in an efficient, high-throughput and reproducible  
148 manner. Already, the databases we have generated in this work constitute by far the largest  
149 resources of such yeast-secretable human protein segments, which will be useful in structural  
150 studies (where high levels of proteins are required for crystallization), immunological  
151 experiments (where recombinant production is needed for vaccine development or antigen  
152 discovery), and biochemical characterizations of particular proteins (which also necessitates a  
153 minimal protein amount). Furthermore, it is likely that SECRiFY will provide a means to  
154 characterize the substrate scope of secretory system processes that regulate secretory protein  
155 passage through the eukaryotic secretory system in a proteome-wide manner. This  
156 complements existing methods, such as ribosome profiling<sup>25</sup>, which deal with protein  
157 biogenesis prior to passage through the secretory system.

158

## 159 **Acknowledgements**

160 The authors thank the VIB Nucleomics Core for Illumina sequencing, as well as M. Vuylsteke  
161 for statistics discussions, K. Vandewalle for help with western blot sample preparation, and Y.  
162 Dondelinger for help with plasmid construction. We thank Lennart Martens for freeing up time  
163 to discuss the project and to allow D.M, D.T., E.V. and P.R. to spend time on this project away  
164 from their main tasks. This work was supported by a Ghent University BOF PhD Fellowship  
165 (M.B.), a PhD Fellowship from the Research Foundation Flanders (FWO) (M.B.), an FWO  
166 research grant (G.0276.13N) (N.C.) and an ERC Consolidator grant no. 616966 (N.C.). E.V. is  
167 a postdoctoral research fellow of the Research Foundation Flanders. P.R. and W.V.  
168 acknowledge support from the Research Foundation Flanders through grant number  
169 G.0328.16N.

170

## 171 **Author Contributions**

172 M.B. performed library constructions, methods development and optimization, screenings,  
173 sequencing data processing and analysis, and wrote the manuscript. P.R. performed structure-

174 based data-interpretation under the supervision of E.V. and W.V. W.V. ran, analyzed and  
175 visualized the biophysical predictions. D.M. and D.T. developed the website interface and the  
176 underlying database. N.C. conceived the project, and assisted in experimental design,  
177 interpretation, and manuscript writing. All authors read, revised and approved the final version  
178 of the manuscript.

179

## 180 **Competing Interests**

181 The authors declare that no competing financial interests exist.

182

183

## 184 **References**

185

- 186 1. Barlowe, C. K. & Miller, E. A. Secretory protein biogenesis and traffic in the early secretory  
187 pathway. *Genetics* **193**, 383–410 (2013).
- 188 2. Braakman, I. & Hebert, D. N. Protein folding in the endoplasmic reticulum. *Cold Spring Harb.*  
189 *Perspect. Biol.* **5**, (2013).
- 190 3. Aviram, N. & Schuldiner, M. Embracing the void-how much do we really know about targeting  
191 and translocation to the endoplasmic reticulum? *Curr. Opin. Cell Biol.* **29C**, 8–17 (2014).
- 192 4. Cornvik, T. *et al.* Colony filtration blot: a new screening method for soluble protein expression in  
193 *Escherichia coli*. *Nat. Methods* **2**, 507–509 (2005).
- 194 5. Seitz, T. *et al.* Enhancing the stability and solubility of the glucocorticoid receptor ligand-binding  
195 domain by high-throughput library screening. *J. Mol. Biol.* **403**, 562–577 (2010).
- 196 6. Lockard, M. A. *et al.* A high-throughput immobilized bead screen for stable proteins and multi-  
197 protein complexes. *Protein Eng. Des. Sel. PEDS* **24**, 565–578 (2011).
- 198 7. Martinez Molina, D. *et al.* Engineering membrane protein overproduction in *Escherichia coli*.  
199 *Protein Sci.* **17**, 673–680 (2008).
- 200 8. Luan, C.-H. *et al.* High-throughput expression of *C. elegans* proteins. *Genome Res.* **14**, 2102–  
201 2110 (2004).
- 202 9. D’Angelo, S. *et al.* Filtering ‘genic’ open reading frames from genomic DNA samples for  
203 advanced annotation. *BMC Genomics* **12 Suppl 1**, S5 (2011).
- 204 10. Gupta, A. *et al.* A novel helper phage enabling construction of genome-scale ORF-enriched  
205 phage display libraries. *PLoS One* **8**, e75212 (2013).
- 206 11. Reich, S. *et al.* Combinatorial Domain Hunting: An effective approach for the identification of  
207 soluble protein domains adaptable to high-throughput applications. *Protein Sci.* **15**, 2356–2365  
208 (2006).



- 209 12. Yumerefendi, H., Tarendeau, F., Mas, P. J. & Hart, D. J. ESPRIT: an automated, library-based  
210 method for mapping and soluble expression of protein domains from challenging targets. *J.*  
211 *Struct. Biol.* **172**, 66–74 (2010).
- 212 13. An, Y., Yumerefendi, H., Mas, P. J., Chesneau, A. & Hart, D. J. ORF-selector ESPRIT: a  
213 second generation library screen for soluble protein expression employing precise open reading  
214 frame selection. *J. Struct. Biol.* **175**, 189–197 (2011).
- 215 14. Pedelacq, J.-D. *et al.* Experimental mapping of soluble protein domains using a hierarchical  
216 approach. *Nucleic Acids Res.* **39**, e125 (2011).
- 217 15. Hart, D. J. & Waldo, G. S. Library methods for structural biology of challenging proteins and  
218 their complexes. *Curr. Opin. Struct. Biol.* **23**, 403–408 (2013).
- 219 16. Prodromou, C., Savva, R. & Driscoll, P. C. DNA fragmentation-based combinatorial approaches  
220 to soluble protein expression Part I. Generating DNA fragment libraries. *Drug Discov. Today* **12**,  
221 931–938 (2007).
- 222 17. Zhulidov, P. A. *et al.* Simple cDNA normalization using kamchatka crab duplex-specific  
223 nuclease. *Nucleic Acids Res.* **32**, e37 (2004).
- 224 18. Bogdanov, E. A. *et al.* Normalizing cDNA libraries. *Curr. Protoc. Mol. Biol.* **Chapter 5**, Unit  
225 5.12.1-27 (2010).
- 226 19. Thibault, G. & Ng, D. T. W. The endoplasmic reticulum-associated degradation pathways of  
227 budding yeast. *Cold Spring Harb. Perspect. Biol.* **4**, (2012).
- 228 20. Xu, C. & Ng, D. T. W. Glycosylation-directed quality control of protein folding. *Nat. Rev. Mol.*  
229 *Cell Biol.* **16**, 742-752 (2015).
- 230 21. Kliman, R. M., Irving, N. & Santiago, M. Selection conflicts, gene expression, and codon usage  
231 trends in yeast. *J. Mol. Evol.* **57**, 98–109 (2003).
- 232 22. Ghaemmaghami, S. *et al.* Global analysis of protein expression in yeast. *Nature* **425**, 737–741  
233 (2003).
- 234 23. Zur, H. & Tuller, T. Strong association between mRNA folding strength and protein abundance  
235 in *S. cerevisiae*. *EMBO Rep.* **13**, 272–277 (2012).
- 236 24. Boël, G. *et al.* Codon influence on protein expression in *E. coli* correlates with mRNA levels.  
237 *Nature* **529**, 358–363 (2016).
- 238 25. Ingolia, N. T., Ghaemmaghami, S., Newman, J. R., S. & Weissman, J. S. Genome-wide  
239 analysis in vivo of translation with nucleotide resolution using ribosome profiling. *Science* **324**,  
240 218–223 (2009).

## Figures

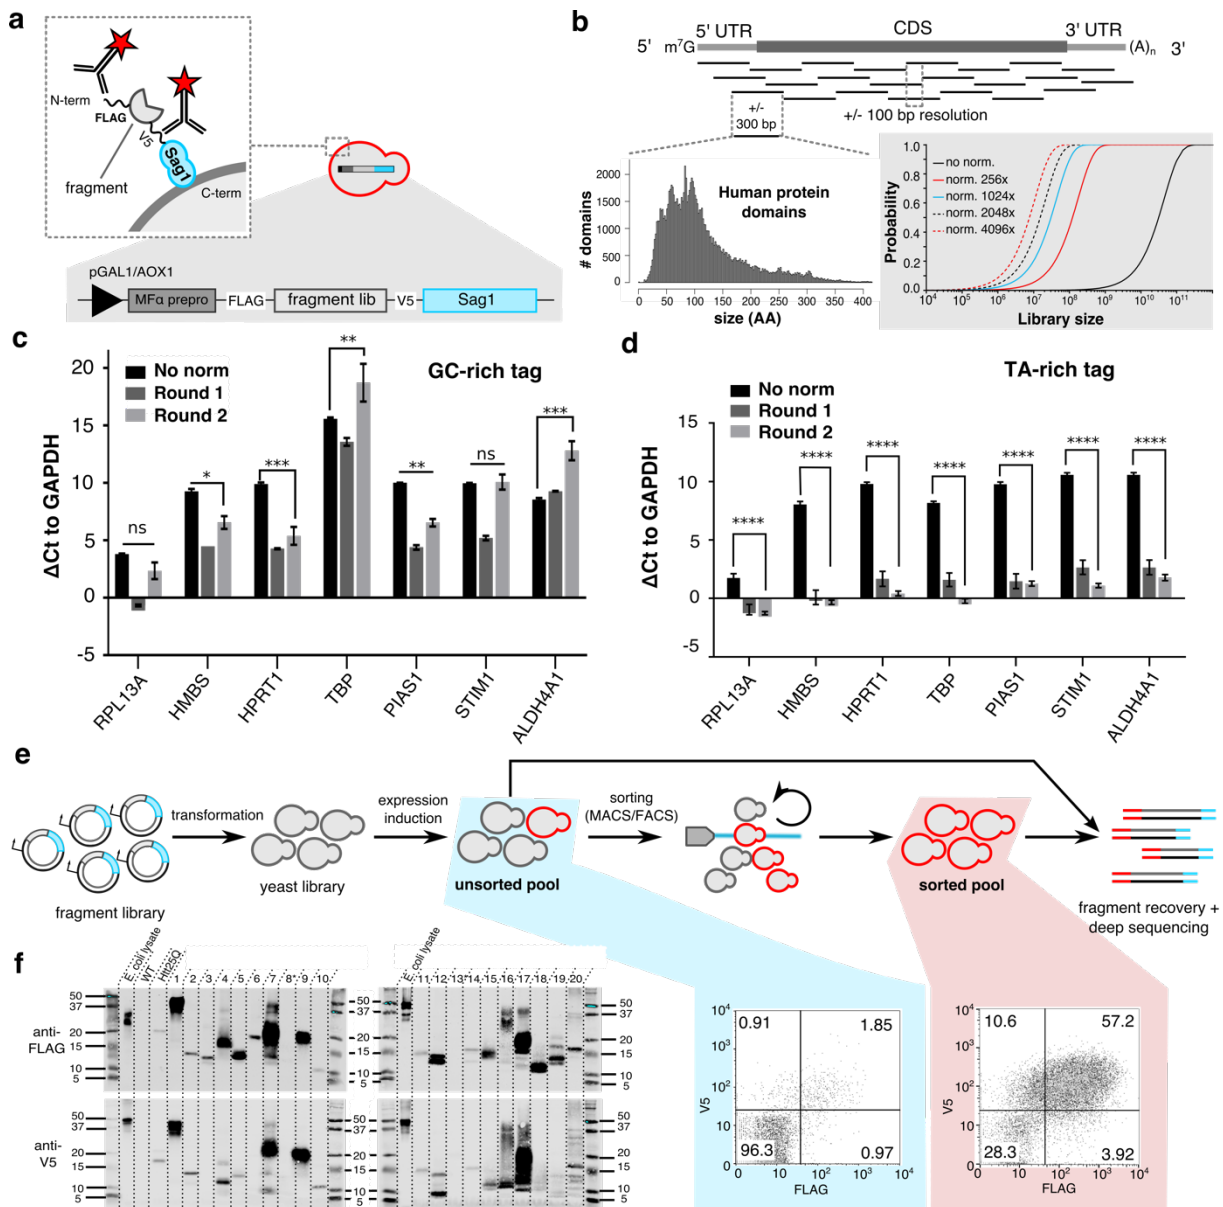

**Fig. 1. The SECriFY surface display platform for secretability screening of fragment libraries in yeast.** (a) Surface display as a proxy for secretion. Productive passage through the yeast secretory system leads to antibody-based labeling of displaying clones through FLAG and V5 epitope tags. (b) Human mRNA is fragmented to mimic the size distribution of human protein domains (lower left, Gene3D,  $n = 104,734$ ). Lower right in grey: estimated relationship between library size and the probability of sampling any fragment, depending on the efficiency of fragment abundance normalization. (c and d) Normalization of abundance differences compared to *GAPDH*, as  $\Delta Ct \pm SEM$ , is effective only when using a TA-rich (d), not a GC-rich (c) tag in the random primer. Two-way ANOVA with Tukey post-hoc, ns: non-significant, \*  $p < 0.05$ , \*\*  $p < 0.01$ , \*\*\*  $p < 0.001$ , \*\*\*\*  $p < 0.0001$ .  $n = 9$ . (e) After fragment expression



induction, displaying FLAG<sup>+</sup>V5<sup>+</sup> clones are sorted in multiple rounds of MACS/FACS. Fragments are identified by deep sequencing of both pools. (f) The majority of protein fragments from sorted cells are detected as secreted when expressed without the Sag1 display anchor.

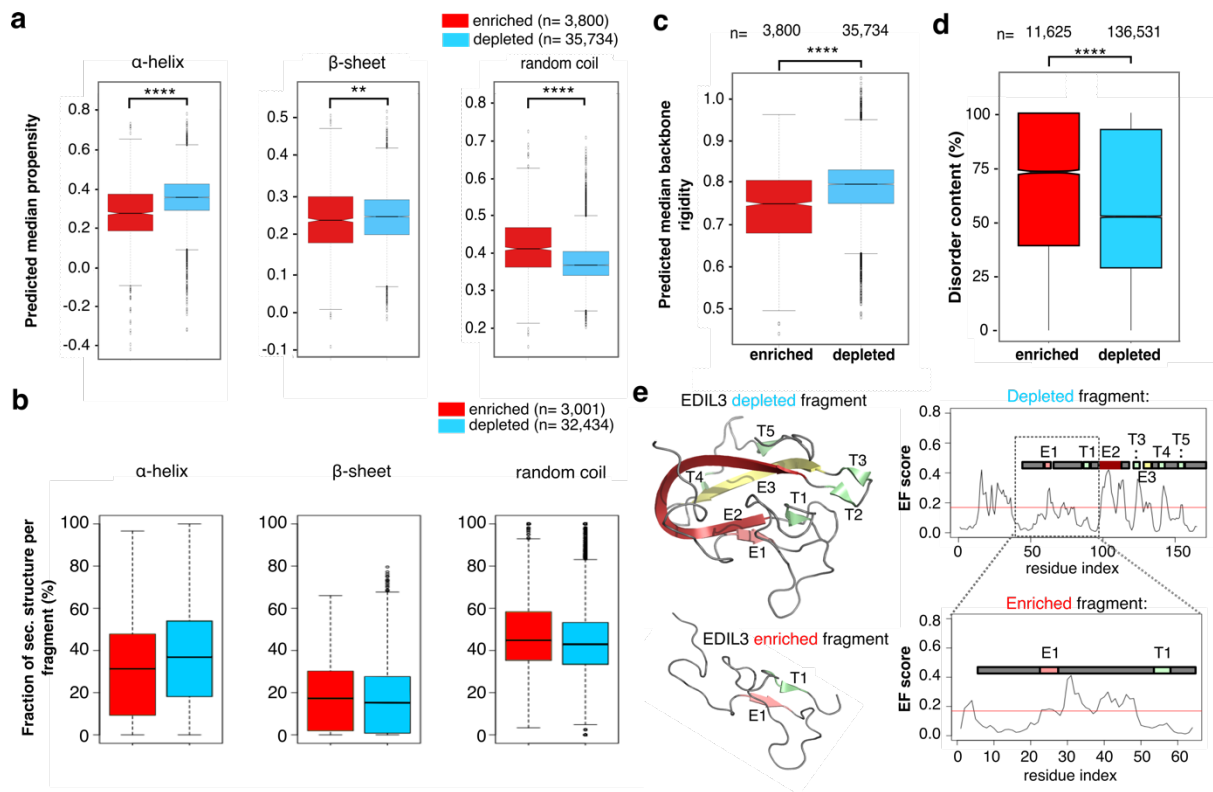

**Fig. 2. Patterns in secretable fragments.** (a). Predictions of secondary structure propensity in enriched and depleted fragments in *S. cerevisiae* shows that enriched fragments have a lower helical content and a higher random coil propensity, which is confirmed further by mapping fragments to known structures in PDB (b). Enriched fragments are also predicted to be more dynamic (c) and disordered (d) than depleted fragments. (e). Two overlapping fragments of the human protein EDIL3 differ in secretability outcome. Early folding (EF) propensity predictions suggest that for the depleted fragment regions E2, T3/E3 and R4 are likely the regions driving folding of the depleted fragment, and lack of these regions in the enriched fragment result in a change in secretability.
